# Supplementary material for: Steering operational synergies in terrestrial observation networks: opportunity for advancing Earth system dynamics modelling
Source: Copernicus journal article supplement (doi:10.5194/esd-9-593-2018), 2018-05-23
Supplement: Supplementary file 1 [file esd-9-593-2018-supplement.zip]

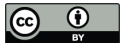

## *Supplement of*

# **Steering operational synergies in terrestrial observation networks: opportunity for advancing Earth system dynamics modelling**

**Roland Baatz et al.**

*Correspondence to:* Roland Baatz ([r.baatz@fz-juelich.de](mailto:r.baatz@fz-juelich.de))

- [esd-9-593-2018-supplement-title-page.pdf](#)
- [Supplement\\_Survey\\_Results.xlsx](#)

The copyright of individual parts of the supplement might differ from the CC BY 4.0 License.
