# Supplementary material for: Steering operational synergies in terrestrial observation networks: opportunity for advancing Earth system dynamics modelling
Source: Copernicus journal article supplement (doi:10.5194/esd-9-593-2018), 2018-05-23
Supplement: Supplementary file 2 [file esd-9-593-2018-supplement.zip]

Archive with 2 entries (2 files):
- Supplement_Survey_Results.xlsx
- esd-9-593-2018-supplement-title-page.pdf
